# Supplementary material for: Biodegradable Polymeric Substances Produced by a Marine Bacterium from a Surplus Stream of the Biodiesel Industry
Source: MDPI journal article supplement (doi:10.3390/bioengineering3040034), 2016-11-30
Supplement: s1 [file s1]

# Supplementary Materials: Biodegradable Polymeric Substances Produced by a Marine Bacterium from a Surplus Stream of the Biodiesel Industry

Sourish Bhattacharya, Sonam Dubey, Priyanka Singh, Anupama Shrivastava and Sandhya Mishra

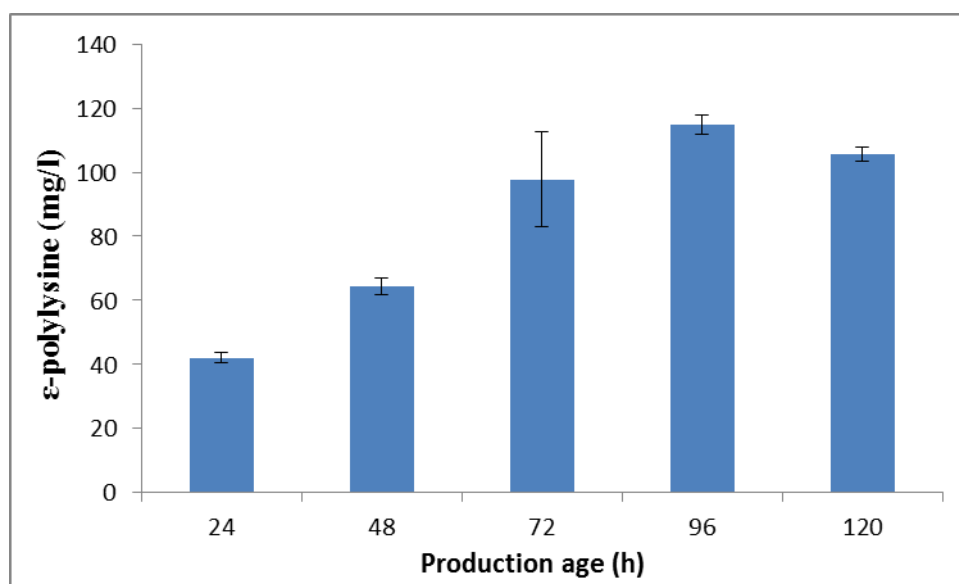

**Figure S1.** Effect of production age (h.) on  $\epsilon$ -polylysine yield at 35 °C.

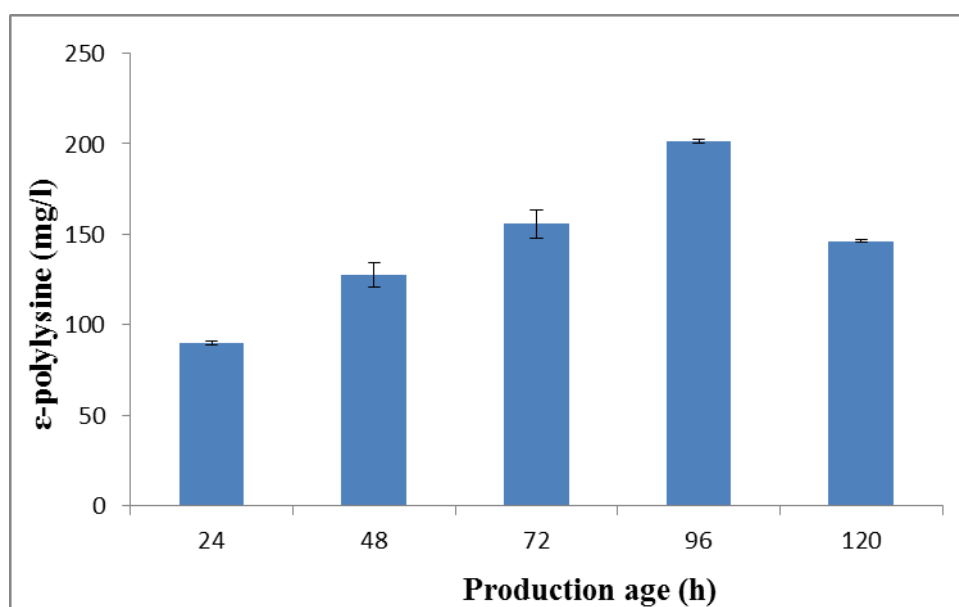

**Figure S2.** Effect of production age (h) on  $\epsilon$ -polylysine yield at 37 °C.

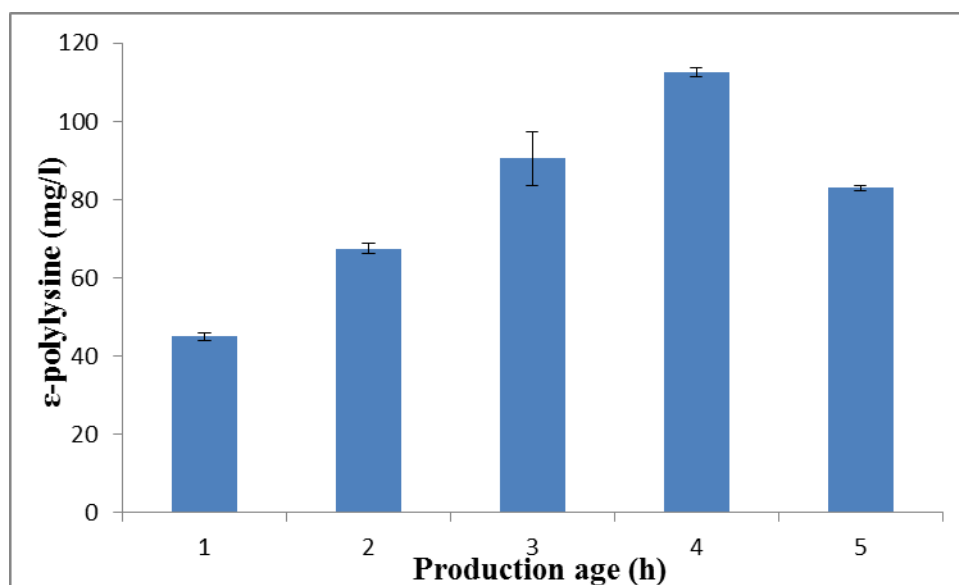

**Figure S3.** Effect of production age (h) on ε-polylysine yield at 40 °C.

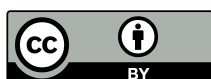

© 2016 by the authors. Submitted for possible open access publication under the terms and conditions of the Creative Commons Attribution (CC-BY) license (<http://creativecommons.org/licenses/by/4.0/>).
